# Supplementary material for: Morphology-Dependent Ullmann C-O Arylation Using Cu2O Nanocrystals
Source: Hindawi journal article supplement (doi:10.1155/2020/6726170), 2020-10-01

**Morphology dependent Ullmann C-O arylation using
Cu2O nanocrystals**

E. Erasmus

SUPPLEMENTARY INFORMATION

**Figure S1.** The particle diameter (Ø) histograms the (A) cubic, (B) octahedral, (C) rhombic dodecahedral, (D) truncated cubic and (E) fluffy spherical structures.

Figure S2. The Tauc plot of the Cu-oxide nanocrystals used to determine the apparent band gap energy, *E*g'. of cubic, TC, octahedral, Oct,rhombic dodecahedral, RD, truncated cubic, TC, and fluffy spherical, FS, structures.

Figure S3.XPS Wide scan of the truncated cube Cu-oxidenanocrystal.

**Graphical Abstract:**


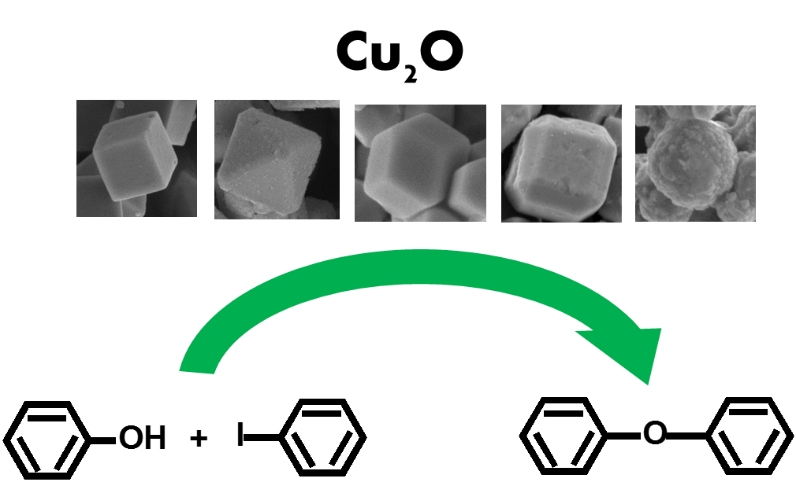

Supplement: f1 [file 6726170.f1.docx]
